# Supplementary material for: Anomalous π-backbonding in complexes between B(SiR 3 ) 3 and N 2 : catalytic activation and breaking of scaling relations
Source: Royal Society of Chemistry journal article supplement (doi:10.1039/d3cp00248a), 2023-01-01
Supplement: d3cp00248a1.pdf [file d3cp00248a1.pdf]

## Supplementary Information for

### **Anomalous $\pi$ -backbonding in complexes between $B(SiR_3)_3$ and $N_2$ : Catalytic activation and breaking of scaling relations**

Tore Brinck\* and Suman Kalyan Sahoo  
Department of Chemistry, CBH, KTH Royal Institute of Technology, SE-100 44 Stockholm,  
Sweden  
E-mail: [tore@kth.se](mailto:tore@kth.se)

#### Table of Contents

|                            |          |
|----------------------------|----------|
| <b>Fig. S1.</b> .....      | <b>2</b> |
| <b>Fig. S2.</b> .....      | <b>2</b> |
| <b>Fig. S3.</b> .....      | <b>3</b> |
| <b>Table S1</b> .....      | <b>4</b> |
| <b>Table S2</b> .....      | <b>5</b> |
| <b>Visualization</b> ..... | <b>5</b> |
| <b>References</b> .....    | <b>5</b> |

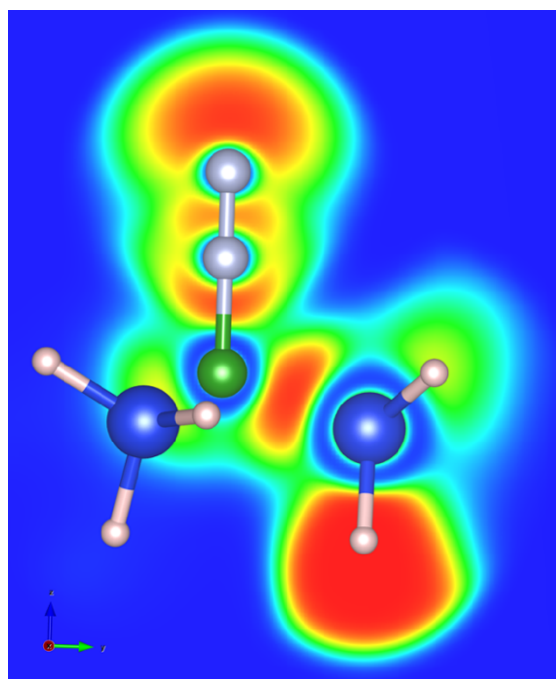

Fig. S1. ELF of  $B(SiH_3)_3 \cdot N_2$ . It is not clear from the ELF pattern whether there is a covalent B-N bond or a non-covalent interaction with the lower lone pair of  $N_2$  interacting with the electron deficient side of B (empty  $sp^3$ ) of  $B(SiH_3)_3$ . Note that VESTA does not draw the B-Si bond because of its length.

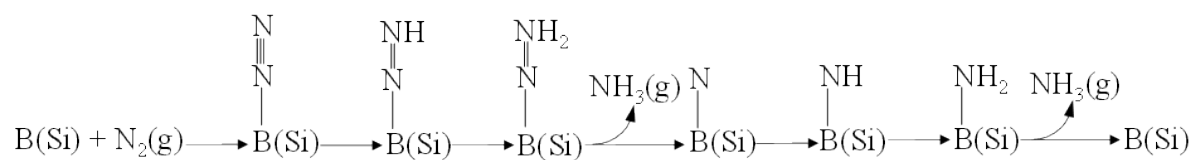

Fig. S2. Schematic depiction of distal pathway for  $N_2$  electro reduction to  $NH_3$  at the reaction site of the B single atom from the B doped Si systems.

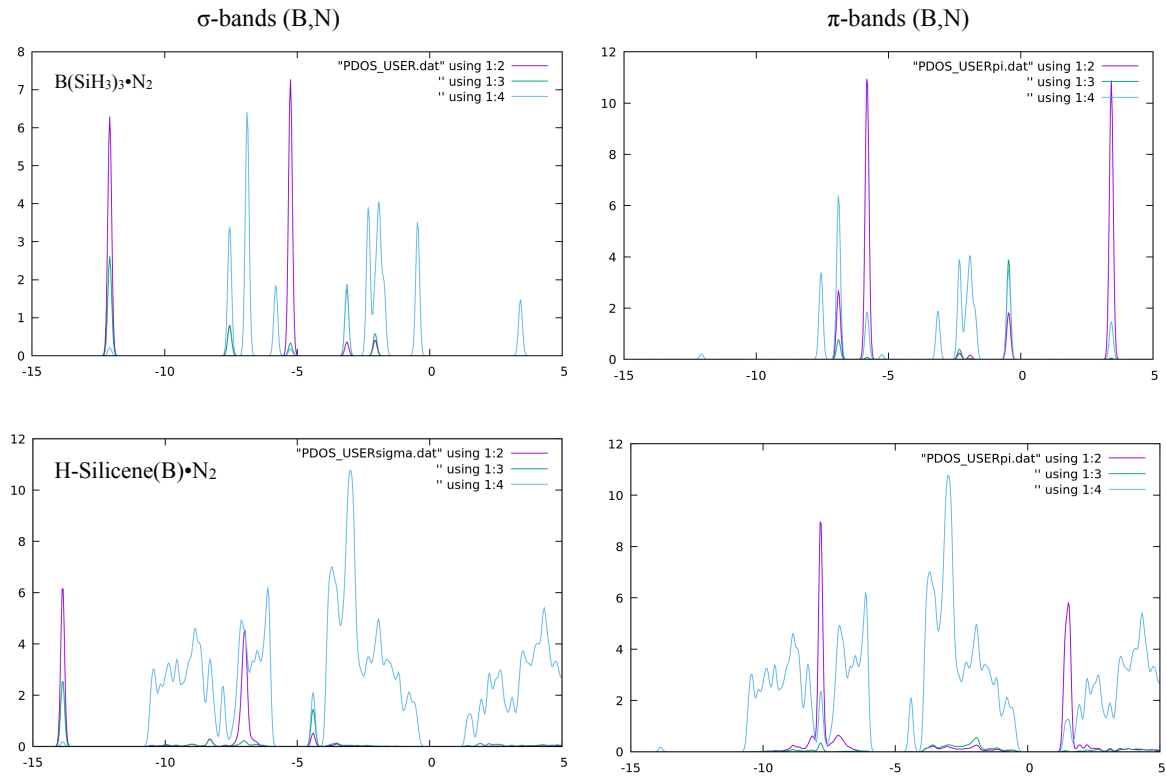

Fig. S3. Partial density of states (PDOS) for  $\text{B}(\text{SiH}_3)_3 \cdot \text{N}_2$  (top) and  $\text{N}_2$  adsorbed on B-doped and hydrogen terminated silicene (bottom). The PDOS analysis is divided into bands/orbitals of  $\sigma$ -symmetry (left) and  $\pi$ -symmetry (right) with respect to the N-N bond, i.e.  $\text{N}(s, p_z)$  and  $\text{B}(s, p_z)$  components for  $\sigma$ -symmetry and  $\text{N}(p_x, p_y)$  and  $\text{B}(p_x, p_y)$  components for  $\pi$ -symmetry. For Si all components ( $s, p, d$ ) are included for both plots. 1:2, 1:3, and 1:4 refers to N, B, and Si elements respectively. The energies of the bands in eV are shifted such that the Fermi level corresponds to 0 (zero) energy. Corresponding plots with the energy shifted so that the LUMO energy is zero are found as Fig. 4 of the main article.

Table S1. Alpha-angle (Deg), bond length and complexation enthalpy for complexes with N<sub>2</sub>, CO and NH<sub>3</sub>

| Lewis Acid                                          | alpha<br>N <sub>2</sub><br>Deg | R <sub>B-N</sub><br>Å | ΔH <sub>N2</sub> | alpha<br>CO<br>Deg | R <sub>B-C</sub><br>Å | ΔH <sub>CO</sub><br>kcal/mol | alpha<br>NH <sub>3</sub> | R <sub>B-N</sub><br>Å | ΔH <sub>NH3</sub><br>kcal/mol |
|-----------------------------------------------------|--------------------------------|-----------------------|------------------|--------------------|-----------------------|------------------------------|--------------------------|-----------------------|-------------------------------|
| B(SiH <sub>3</sub> ) <sub>3</sub>                   | 109.2                          | 1.477                 | -15.9            | 109.2              | 1.463                 | -45.4                        | 108.6                    | 1.635                 | -35.2                         |
| B(Si(CH <sub>3</sub> ) <sub>3</sub> ) <sub>3</sub>  | 106.2                          | 1.465                 | -19.5            | 105.6              | 1.451                 | -50.6                        | 107.3                    | 1.646                 | -32.8                         |
| B(Si(SiH <sub>3</sub> ) <sub>3</sub> ) <sub>3</sub> | 105.6                          | 1.493                 | -10.1            | 104.7              | 1.475                 | -38.3                        | 107.6                    | 1.626                 | -36.1                         |
| B(Si(OH) <sub>3</sub> ) <sub>3</sub>                | 110.3                          | 1.479                 | -24.9            | 110.0              | 1.464                 | -54.7                        | 107.2                    | 1.631                 | -54.4                         |
| B(SiF <sub>3</sub> ) <sub>3</sub>                   | 108.9                          | 1.505                 | -23.9            | 105.5              | 1.486                 | -52.0                        | 106.5                    | 1.635                 | -56.6                         |
| B(GeH <sub>3</sub> ) <sub>3</sub>                   | 108.4                          | 1.474                 | -16.4            | 107.9              | 1.464                 | -46.5                        | 107.8                    | 1.632                 | -35.8                         |
| B(Ge(CH <sub>3</sub> ) <sub>3</sub> ) <sub>3</sub>  | 107.0                          | 1.460                 | -21.0            | 106.5              | 1.452                 | -52.4                        | 107.8                    | 1.639                 | -34.4                         |
| B(CH <sub>3</sub> ) <sub>3</sub>                    | -                              | -                     | -                | 105.5              | 1.607                 | -1.9                         | 106                      | 1.601                 | -13.9                         |
| B(CF <sub>3</sub> ) <sub>3</sub>                    | 104.3                          | 1.622                 | -14.7            | 103.4              | 1.665                 | -30.1                        | 105.3                    | 1.623                 | -61.2                         |
| B(CN) <sub>3</sub>                                  | 101.5                          | 1.779                 | 0.2              | 102.7              | 1.687                 | -13.6                        | 105                      | 1.614                 | -45.9                         |
| BCl <sub>3</sub>                                    | -                              | -                     | -                | 104.8              | 1.590                 | 4.0                          | 104.4                    | 1.679                 | -25.5                         |
| BH <sub>3</sub>                                     | 102.3                          | 1.594                 | -5.0             | 103.7              | 1.539                 | -25.3                        | 110.8                    | 1.651                 | -27.5                         |
| Al(SiH <sub>3</sub> ) <sub>3</sub>                  | 94.0                           | 2.252                 | -5.2             | 95.5               | 2.118                 | -13.0                        | 99.1                     | 2.072                 | -28.9                         |
| Al(CF <sub>3</sub> ) <sub>3</sub>                   | 94.4                           | 2.157                 | -13.0            | 95.0               | 2.206                 | -19.0                        | 99.2                     | 1.991                 | -50.3                         |
| AlCl <sub>3</sub>                                   | 96.1                           | 2.223                 | -5.8             | 97.1               | 2.221                 | -11.1                        | 100.9                    | 1.989                 | -38.3                         |

Table S2. Atomic charges of B(SiH<sub>3</sub>)<sub>3</sub>•N<sub>2</sub> and the system of N<sub>2</sub> bonded to boron doped H-silicene.

| System                                            | Method                  | H     | Si                | B     | N <sub>(1)</sub> | N <sub>(2)</sub> | Δq <sup>a</sup> |
|---------------------------------------------------|-------------------------|-------|-------------------|-------|------------------|------------------|-----------------|
| B(SiH <sub>3</sub> ) <sub>3</sub> •N <sub>2</sub> | Bader/VASP <sup>b</sup> | -0.61 | 2.30              | -0.87 | -0.80            | 0.32             | -0.48           |
| H-Silicene(B)•N <sub>2</sub>                      | Bader/VASP <sup>b</sup> | -0.58 | 0.92 <sup>c</sup> | -0.38 | -0.74            | 0.26             | -0.48           |
| B(SiH <sub>3</sub> ) <sub>3</sub> •N <sub>2</sub> | Bader <sup>c</sup>      | -0.62 | 2.29              | -0.79 | -0.52            | 0.07             | -0.45           |
| B(SiH <sub>3</sub> ) <sub>3</sub> •N <sub>2</sub> | APT <sup>d</sup>        | -0.23 | 0.84              | -0.67 | 0.59             | -0.41            | 0.18            |
| B(SiH <sub>3</sub> ) <sub>3</sub> •N <sub>2</sub> | MK <sup>e</sup>         | -0.14 | 0.57              | -0.64 | 0.42             | -0.21            | 0.21            |
| B(SiH <sub>3</sub> ) <sub>3</sub> •N <sub>2</sub> | MBS <sup>f</sup>        | -0.09 | 0.33              | -0.20 | 0.04             | -0.01            | 0.03            |
| B(SiH <sub>3</sub> ) <sub>3</sub> •N <sub>2</sub> | NBO <sup>g</sup>        | -0.11 | 0.60              | -0.91 | -0.01            | 0.08             | 0.07            |
| B(SiH <sub>3</sub> ) <sub>3</sub> •N <sub>2</sub> | Hirshfeld <sup>h</sup>  | -0.06 | 0.21              | -0.16 | 0.11             | 0.00             | 0.11            |

<sup>a</sup>Charge transfer to N<sub>2</sub>, i.e.  $q(N_{(1)}) + q(N_{(2)})$ . <sup>b</sup>Bader charge<sup>1</sup> computed from the charge density obtained by VASP using a plane wave basis.<sup>2</sup> <sup>c</sup>Si bonded to B. <sup>e</sup>Bader charge computed from the charge density obtained at the PBE/6-31+G(2d,p) level using analytical integration in G16. Following charge methods use the same charge density/wavefunction.<sup>d</sup>Atomic polar tensor charges.<sup>3</sup> <sup>e</sup>Electrostatic potential derived charges using Merz-Kollman scheme.<sup>4</sup> <sup>f</sup>Minimum basis set localization population analysis.<sup>5</sup> <sup>g</sup>NBO charges.<sup>6</sup> <sup>h</sup>Hirshfeld charges.<sup>7</sup>

## Visualization

Visualization of results were done using Molden,<sup>8</sup> Vesta,<sup>9</sup> LUMO and ChimeraX<sup>10</sup> for molecular structures, difference plots, molecular orbitals and surface properties, respectively. Magic Plot and Gnuplot was used for PDOS plots.

## References

- [1] R. F. W. Bader, *Chem. Rev.* 1991, **91**, 893-928.
- [2] W. Tang, E. Sanville, G. Henkelman, *J. Phys.: Condens. Matter* 2009, **21**, 084204.
- [3] J. Cioslowski, *J. Am. Chem. Soc.* 1989, **111**, 8333-8336.
- [4] B. H. Besler, K. M. Merz Jr., P. A. Kollman, *J. Comp. Chem.* 1990, **11**, 431-439.
- [5] J. A. Montgomery, Jr., M. J. Frisch, J. W. Ochterski, G. A. Petersson, *J. Chem. Phys.* 2000, **112**, 6532-6542.
- [6] A. E. Reed, L. A. Curtiss, F. Weinhold, *Chem. Rev.* 1988, **88**, 899-926.
- [7] F. L. Hirshfeld, *Theoret. Chim. Acta* 1977, **44**, 129-138.
- [8] G. Schaftenaar, J. H. Noordik, *Journal of computer-aided molecular design* 2000, **14**, 123-134.
- [9] K. Momma, F. Izumi, *J. Appl. Crystallogr.* 2011, **44**, 1272-1276.
- [10] E. F. Pettersen, T. D. Goddard, C. C. Huang, E. C. Meng, G. S. Couch, T. I. Croll, J. H. Morris, T. E. Ferrin, *Protein Science* 2021, **30**, 70-82.
